# Supplementary material for: Population pharmacokinetic/pharmacodynamic modeling of the psychedelic experience induced by N,N‐dimethyltryptamine – Implications for dose considerations
Source: PubMed Central journal article supplement — Clin Transl Sci. 2022 Sep 27;15(12):2928–37. doi: 10.1111/cts.13410 (PMC9747126; doi:10.1111/cts.13410), 2022-09-27
Supplement: CTS-15-2928-s001.pdf [file CTS-15-2928-s001.pdf]

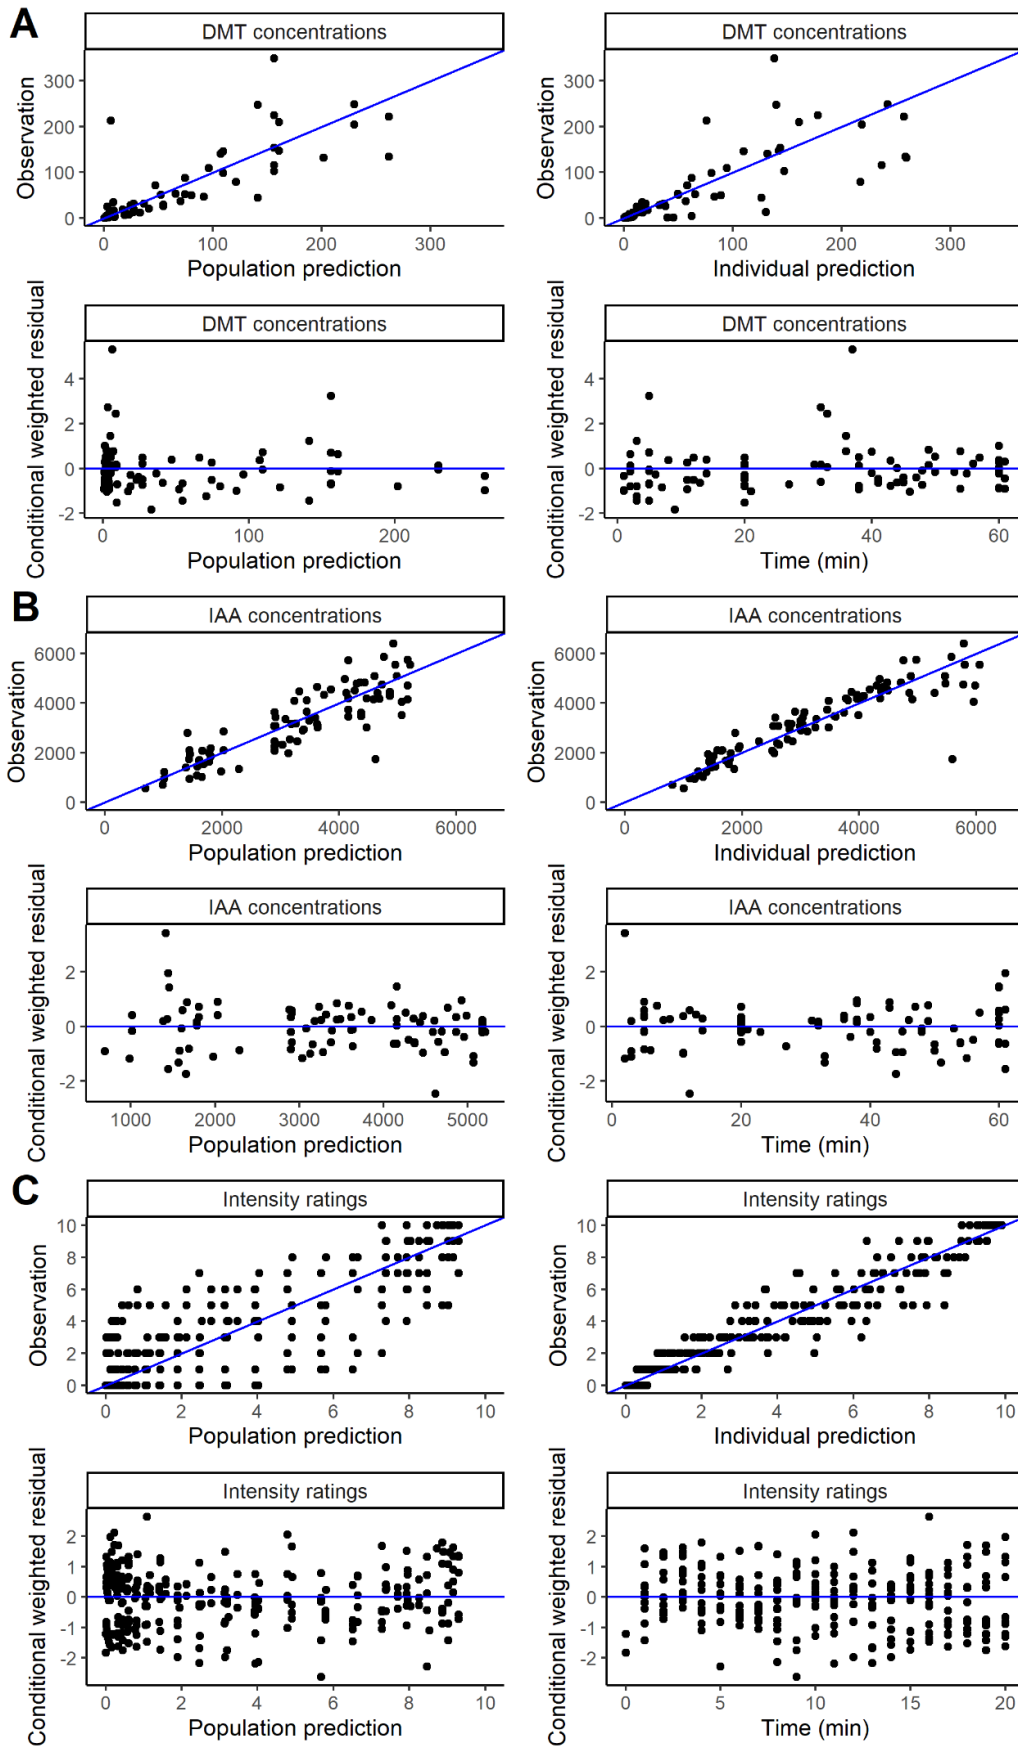

Figure S1. Goodness-of-fit plots used for model evaluation for A) N,N-dimethyltryptamine plasma concentrations, B) indole-3 acetic acid plasma concentrations and C) the subjective intensity ratings.
